# Supplementary material
Source: HighWire-hosted journal article supplement (http://ghspjournal.org/highwire/filestream/5773/field_highwire_adjunct_files/0/GHSP-D-21-00597-supplement.pdf)
Supplement: GHSP-D-21-00597-supplement.pdf [file GHSP-D-21-00597-supplement.pdf]

**Supplement to:** Bell S, Larson E, Wood SN; PMA Principal Investigators Group. Let's talk about sex: improving measurement of contraceptive use in cross-sectional surveys by accounting for sexual activity recency. *Glob Health Sci Pract.* 2021;10(2): e2100597. <https://doi.org/10.9745/GHSP-D-21-00597>

**Supplement Table 1. Contraceptive Prevalence Using Current Use, Use at Last Sex, and a Comprehensive Measure by Marital Status, and Site**

| <b>Appendix Table 1. Contraceptive prevalence using current use, use at last sex, and a comprehensive measure by marital status and site</b> |              |        |      |               |        |      |               |        |      |                    |        |      |         |        |      |               |        |      |                |        |      |        |        |      |         |        |      |
|----------------------------------------------------------------------------------------------------------------------------------------------|--------------|--------|------|---------------|--------|------|---------------|--------|------|--------------------|--------|------|---------|--------|------|---------------|--------|------|----------------|--------|------|--------|--------|------|---------|--------|------|
|                                                                                                                                              | Burkina Faso |        |      | Cote d'Ivoire |        |      | DRC: Kinshasa |        |      | DRC: Kongo Central |        |      | Kenya   |        |      | Nigeria: Kano |        |      | Nigeria: Lagos |        |      | Niger  |        |      | Uganda  |        |      |
|                                                                                                                                              | %            | 95% CI |      | %             | 95% CI |      | %             | 95% CI |      | %                  | 95% CI |      | %       | 95% CI |      | %             | 95% CI |      | %              | 95% CI |      | %      | 95% CI |      | %       | 95% CI |      |
| <b>Married women</b>                                                                                                                         | N= 3864      |        |      | N= 2251       |        |      | N= 997        |        |      | N= 1005            |        |      | N= 5033 |        |      | N= 688        |        |      | N= 795         |        |      | N= 702 |        |      | N= 1955 |        |      |
| Current contraceptive use                                                                                                                    | 34.6         | 30.8   | 38.7 | 32.8          | 28.8   | 37.2 | 61.8          | 56.8   | 66.6 | 48.1               | 40.3   | 56.0 | 66.3    | 64.4   | 68.1 | 14.9          | 10.2   | 21.2 | 50.2           | 45.7   | 54.7 | 35.5   | 30.6   | 40.6 | 52.9    | 49.7   | 56.1 |
| Contraceptive use at last sex                                                                                                                | 27.9         | 23.9   | 32.2 | 24.6          | 20.4   | 29.2 | 58.0          | 53.2   | 62.8 | 36.4               | 30.0   | 43.3 | 57.2    | 54.3   | 60.0 | 10.5          | 6.3    | 16.8 | 42.1           | 37.8   | 46.5 | 26.8   | 21.5   | 32.9 | 48.4    | 44.9   | 52.0 |
| Comprehensive contraceptive use                                                                                                              | 37.3         | 33.4   | 41.4 | 33.9          | 29.7   | 38.3 | 64.4          | 59.5   | 69.1 | 53.1               | 45.6   | 60.4 | 68.8    | 67.0   | 70.6 | 15.3          | 10.6   | 21.7 | 52.7           | 48.3   | 57.1 | 37.1   | 32.9   | 41.5 | 55.7    | 52.6   | 58.7 |
| <b>Unmarried women</b>                                                                                                                       | N= 1152      |        |      | N= 1069       |        |      | N= 953        |        |      | N= 550             |        |      | N= 2347 |        |      | N= 50         |        |      | N= 331         |        |      | N= 149 |        |      | N= 967  |        |      |
| Current contraceptive use                                                                                                                    | 40.1         | 35.4   | 44.9 | 43.5          | 37.6   | 49.6 | 52.6          | 47.3   | 57.9 | 40.6               | 32.7   | 49.1 | 42.4    | 39.3   | 45.7 | 0.6           | 0.1    | 3.9  | 45.0           | 39.7   | 50.5 | 10.8   | 5.9    | 18.9 | 34.6    | 25.8   | 44.5 |
| Contraceptive use at last sex                                                                                                                | 46.2         | 40.9   | 51.5 | 41.7          | 37.6   | 45.9 | 58.1          | 53.3   | 62.8 | 38.2               | 30.8   | 46.2 | 50.1    | 46.9   | 53.3 | 3.1           | 0.9    | 10.1 | 50.6           | 45.2   | 56.0 | 15.7   | 9.7    | 24.5 | 51.6    | 44.6   | 58.6 |
| Comprehensive contraceptive use                                                                                                              | 53.9         | 48.0   | 59.7 | 52.2          | 47.7   | 56.6 | 63.2          | 58.3   | 67.8 | 46.0               | 38.4   | 53.9 | 58.7    | 55.5   | 61.8 | 3.1           | 0.9    | 10.1 | 56.6           | 51.3   | 61.9 | 17.3   | 11.1   | 26.0 | 56.1    | 49.6   | 62.4 |

**Supplement to:** Bell S, Larson E, Wood SN; PMA Principal Investigators Group. Let's talk about sex: improving measurement of contraceptive use in cross-sectional surveys by accounting for sexual activity recency. *Glob Health Sci Pract.* 2021;10(2): e2100597. <https://doi.org/10.9745/GHSP-D-21-00597>

**Supplement Table 2. Contraceptive Prevalence Using Current Use, Use at Last Sex, and a Comprehensive Measure by Marital Status, Whether Woman Had Sex in Last Month, and Site**

| <b>Appendix Table 2. Contraceptive prevalence using current use, use at last sex, and a comprehensive measure by marital status, whether had sex in last month, and site</b> |              |        |      |               |        |      |               |        |      |                   |        |      |         |        |      |               |        |      |                |        |      |        |        |      |         |        |      |
|------------------------------------------------------------------------------------------------------------------------------------------------------------------------------|--------------|--------|------|---------------|--------|------|---------------|--------|------|-------------------|--------|------|---------|--------|------|---------------|--------|------|----------------|--------|------|--------|--------|------|---------|--------|------|
| <b>Sex last month</b>                                                                                                                                                        | Burkina Faso |        |      | Cote d'Ivoire |        |      | DRC: Kinshasa |        |      | DRC: Kongo Centra |        |      | Kenya   |        |      | Nigeria: Kano |        |      | Nigeria: Lagos |        |      | Niger  |        |      | Uganda  |        |      |
|                                                                                                                                                                              | %            | 95% CI |      | %             | 95% CI |      | %             | 95% CI |      | %                 | 95% CI |      | %       | 95% CI |      | %             | 95% CI |      | %              | 95% CI |      | %      | 95% CI |      | %       | 95% CI |      |
| <b>Married women</b>                                                                                                                                                         | N= 2750      |        |      | N= 1696       |        |      | N= 846        |        |      | N= 861            |        |      | N= 4320 |        |      | N= 606        |        |      | N= 643         |        |      | N= 556 |        |      | N= 1614 |        |      |
| Current contraceptive use                                                                                                                                                    | 44.8         | 40.3   | 49.4 | 37.3          | 32.8   | 42.0 | 68.2          | 63     | 73   | 52.0              | 43.4   | 60.5 | 70.3    | 68.3   | 72.2 | 16.3          | 11.4   | 22.7 | 54.0           | 49.3   | 58.6 | 40.4   | 35.2   | 45.8 | 59.1    | 55.3   | 62.8 |
| Contraceptive use at last sex                                                                                                                                                | 35.3         | 30.3   | 40.6 | 28.9          | 24.2   | 34.1 | 62.2          | 56.4   | 67.6 | 40.1              | 33.1   | 47.6 | 60.5    | 57.4   | 63.5 | 11.5          | 7.1    | 18.0 | 46.0           | 41.3   | 50.7 | 29.9   | 24.1   | 36.4 | 52.4    | 47.9   | 56.9 |
| Comprehensive contraceptive use                                                                                                                                              | 46.3         | 41.8   | 50.8 | 38.0          | 33.5   | 42.7 | 68.8          | 63.7   | 73.5 | 57.2              | 48.9   | 65.1 | 71.9    | 69.9   | 73.8 | 16.8          | 11.8   | 23.3 | 56.4           | 51.9   | 60.8 | 41.3   | 36.4   | 46.3 | 60.0    | 56.2   | 63.7 |
| <b>Unmarried women</b>                                                                                                                                                       | N= 469       |        |      | N= 490        |        |      | N= 459        |        |      | N= 253            |        |      | N= 842  |        |      | N= 9          |        |      | N= 124         |        |      | N= 13  |        |      | N= 283  |        |      |
| Current contraceptive use                                                                                                                                                    | 59.4         | 52.6   | 65.9 | 64.0          | 59.1   | 68.6 | 75.1          | 67.4   | 81.5 | 58.9              | 46.8   | 70   | 63.6    | 58.3   | 68.6 | 0.0           | --     | --   | 71.7           | 62.9   | 79.2 | 51.1   | 20.3   | 81.1 | 61.6    | 50.0   | 72.1 |
| Contraceptive use at last sex                                                                                                                                                | 61.3         | 54.5   | 67.6 | 57.4          | 51.7   | 62.9 | 72.5          | 65.6   | 78.5 | 54.5              | 45.2   | 63.5 | 64.3    | 59.0   | 69.2 | 8.1           | 0.6    | 56.0 | 64.0           | 55.8   | 71.5 | 57.6   | 24.1   | 85.3 | 64.4    | 52.8   | 74.5 |
| Comprehensive contraceptive use                                                                                                                                              | 70.5         | 64.0   | 76.4 | 69.3          | 64.9   | 73.3 | 78.2          | 71.3   | 83.8 | 64.3              | 54.2   | 73.3 | 72.6    | 67.7   | 77.1 | 8.1           | 0.6    | 56.0 | 74.4           | 66.3   | 81.0 | 57.6   | 24.1   | 85.3 | 69.5    | 59.4   | 78.0 |
| <b>No sex last month</b>                                                                                                                                                     | N= 1114      |        |      | N= 555        |        |      | N= 151        |        |      | N= 144            |        |      | N= 713  |        |      | N= 82         |        |      | N= 152         |        |      | N= 146 |        |      | N= 341  |        |      |
| Current contraceptive use                                                                                                                                                    | 17.1         | 13.7   | 21.1 | 18.4          | 13.5   | 24.4 | 23.9          | 15.5   | 35.1 | 26.1              | 19     | 34.6 | 42.9    | 38.7   | 47.3 | 4.2           | 1.5    | 11.0 | 34.0           | 25.5   | 43.7 | 16.7   | 8.9    | 29.0 | 23.7    | 17.4   | 31.5 |
| Contraceptive use at last sex                                                                                                                                                | 15.2         | 11.7   | 19.5 | 10.5          | 6.73   | 16.1 | 33.6          | 25.9   | 42.4 | 15.5              | 10.5   | 22.2 | 37.8    | 33.1   | 42.6 | 2.6           | 0.8    | 8.6  | 25.2           | 18.5   | 33.4 | 15.2   | 8.3    | 26.4 | 29.7    | 20.2   | 41.2 |
| Comprehensive contraceptive use                                                                                                                                              | 22.0         | 17.8   | 26.8 | 20.4          | 15     | 27.2 | 38.3          | 28.6   | 48.9 | 29.6              | 21.9   | 38.7 | 50.7    | 45.9   | 55.5 | 4.2           | 1.5    | 11.0 | 36.9           | 28.2   | 46.5 | 21.1   | 12.8   | 32.6 | 35.1    | 27.0   | 44.1 |
| <b>Unmarried women</b>                                                                                                                                                       | N= 683       |        |      | N= 579        |        |      | N= 494        |        |      | N= 297            |        |      | N= 1505 |        |      | N= 41         |        |      | N= 207         |        |      | N= 136 |        |      | N= 684  |        |      |
| Current contraceptive use                                                                                                                                                    | 26.4         | 22.0   | 31.3 | 26.6          | 18.6   | 36.5 | 29.3          | 24.1   | 35.1 | 25.4              | 18.3   | 34.1 | 30.8    | 27.9   | 33.9 | 0.8           | 0.1    | 4.8  | 30.4           | 24.8   | 36.6 | 6.9    | 3.3    | 14.1 | 23.4    | 14.7   | 35.1 |
| Contraceptive use at last sex                                                                                                                                                | 35.5         | 30.1   | 41.3 | 28.7          | 24.4   | 33.5 | 43.2          | 38.2   | 48.3 | 24.7              | 17.8   | 33.1 | 42.3    | 39.3   | 45.4 | 1.8           | 0.5    | 7.1  | 43.3           | 36.7   | 50.1 | 11.6   | 6.3    | 20.5 | 46.4    | 36.5   | 56.5 |
| Comprehensive contraceptive use                                                                                                                                              | 42.1         | 35.9   | 48.5 | 38.1          | 31.4   | 45.3 | 47.6          | 42.6   | 52.5 | 30.8              | 23.3   | 39.5 | 51.0    | 47.8   | 54.2 | 1.8           | 0.5    | 7.1  | 46.9           | 40.1   | 53.8 | 13.4   | 7.8    | 22.2 | 50.6    | 41.6   | 59.6 |

**Supplement to:** Bell S, Larson E, Wood SN; PMA Principal Investigators Group. Let's talk about sex: improving measurement of contraceptive use in cross-sectional surveys by accounting for sexual activity recency. *Glob Health Sci Pract.* 2021;10(2): e2100597. <https://doi.org/10.9745/GHSP-D-21-00597>

**Supplement Table 3. Contraceptive Method Mix Among Women Using Contraception According to Current Use and Use At Last Sex Measures, by Site**

**Appendix Table 3. Contraceptive method mix among women using contraception according to current use and at last sex measures, by site**

|                         | Burkina Faso |      | Cote d'Ivoire |      |      | DRC: Kinshasa |       |      | DRC: Kongo Central |      |      | Kenya |      |      | Nigeria: Kano |      |       | Nigeria: Lagos |      |      | Niger |      |      | Uganda |      |      |       |      |      |      |       |      |      |      |       |      |
|-------------------------|--------------|------|---------------|------|------|---------------|-------|------|--------------------|------|------|-------|------|------|---------------|------|-------|----------------|------|------|-------|------|------|--------|------|------|-------|------|------|------|-------|------|------|------|-------|------|
|                         | %            |      | CCUO          | CCU  | CULS | %             |       | CCUO | CCU                | CULS | %    |       | CCUO | CCU  | CULS          | %    |       | CCUO           | CCU  | CULS | %     |      | CCUO | CCU    | CULS | %    |       |      |      |      |       |      |      |      |       |      |
|                         | CCUO         | CCU  |               |      |      | CULS          | CULSO |      |                    |      | CCUO | CCU   |      |      |               | CULS | CULSO |                |      |      | CCUO  | CCU  |      |        |      | CULS | CULSO | CCUO | CCU  | CULS | CULSO | CCUO | CCU  | CULS | CULSO | CCUO |
| Sterilization           | 0.8          | 0.4  | 0.3           | 0.2  | 0.0  | 19.8          | 0.1   | 1.0  | 1.7                | 0.7  | 0.6  | 2.3   | 4.0  | 1.5  | 0.6           | 0.0  | 4.2   | 4.5            | 3.6  | 0.3  | 1.1   | 1.5  | 1.6  | 0.0    | 1.6  | 0.4  | 0.2   | 2.9  | 2.4  | 0.7  | 0.0   | 0.0  | 8.6  | 4.2  | 2.9   | 0.3  |
| LARC                    | 48.6         | 47.5 | 40.9          | 5.1  | 27.8 | 36.3          | 15.2  | 3.5  | 7.9                | 16.4 | 15.0 | 3.6   | 30.6 | 23.7 | 17.5          | 2.6  | 40.5  | 40.1           | 34.9 | 4.5  | 20.7  | 34.4 | 36.8 | 0.0    | 19.5 | 18.8 | 16.4  | 0.0  | 22.7 | 23.0 | 22.8  | 26.4 | 35.9 | 31.3 | 25.0  | 3.4  |
| Short-acting hormonal   | 37.6         | 33.0 | 29.4          | 23.7 | 40.3 | 22.5          | 31.0  | 13.7 | 6.3                | 9.4  | 8.5  | 33.3  | 22.2 | 17.6 | 14.3          | 7.0  | 40.4  | 40.3           | 36.3 | 18.6 | 59.1  | 47.4 | 41.5 | 8.3    | 15.1 | 15.2 | 12.2  | 4.8  | 68.4 | 68.3 | 67.7  | 54.4 | 28.1 | 35.3 | 33.0  | 23.9 |
| Coital dependent modern | 4.1          | 11.9 | 22.8          | 62.8 | 11.9 | 21.4          | 33.8  | 67.2 | 25.5               | 26.1 | 28.3 | 60.8  | 13.2 | 18.5 | 22.6          | 32.1 | 3.9   | 8.3            | 18.5 | 65.0 | 2.2   | 1.6  | 3.7  | 56.0   | 23.0 | 30.3 | 33.0  | 53.3 | 1.2  | 2.8  | 4.0   | 9.6  | 7.4  | 10.8 | 20.0  | 52.0 |
| Other                   | 8.9          | 7.2  | 6.6           | 8.2  | 19.9 | 21.4          | 19.9  | 14.6 | 58.6               | 47.3 | 47.7 | 60.8  | 30.0 | 38.7 | 45.0          | 58.3 | 11.0  | 6.8            | 6.7  | 11.7 | 17.0  | 15.1 | 16.3 | 35.7   | 40.8 | 35.3 | 38.3  | 39.0 | 5.4  | 5.2  | 5.5   | 9.5  | 19.9 | 18.5 | 19.1  | 20.3 |
| N                       | 504          | 2155 | 1922          | 270  | 308  | 1116          | 949   | 134  | 99                 | 1081 | 1134 | 133   | 187  | 767  | 660           | 75   | 791   | 4247           | 4003 | 514  | 34    | 125  | 96   | 5      | 101  | 545  | 509   | 58   | 74   | 274  | 221   | 21   | 182  | 1343 | 1431  | 237  |

CCUO = current contraceptive use only (not reported at last sex)  
 CCU = current contraceptive use  
 CULS = contraceptive use at last sex  
 CULSO = contraceptive use at last sex only (no current use reported)
